# Supplementary material for: Multi-Omic Dynamics Associate Oxygenic Photosynthesis with Nitrogenase-Mediated H2 Production in Cyanothece sp. ATCC 51142
Source: PubMed Central journal article supplement (PMC4630603; doi:10.1038/srep16004), 2015-11-03
Supplement: srep16004-s1.pdf [file srep16004-s1.pdf]

## Supplementary file for:

Multi-Omic Dynamics Associate Oxygenic Photosynthesis with Nitrogenase-Mediated H<sub>2</sub> Production in *Cyanothece* sp. ATCC 51142

**Authors:** Hans C. Bernstein<sup>1,2\*</sup>, Moiz A. Charania<sup>2</sup>, Ryan S. McClure<sup>2</sup>, Natalie C. Sadler<sup>2</sup>, Matthew R. Melnicki<sup>2</sup>, Eric A. Hill<sup>2</sup>, Lye Meng Markillie<sup>2</sup>, Carrie D. Nicora<sup>2</sup>, Aaron T. Wright<sup>2</sup>, Margaret F. Romine<sup>2</sup>, Alexander S. Beliaev<sup>2\*</sup>

**Affiliations:** <sup>1</sup>Chemical and Biological Signature Science, Pacific Northwest National Laboratory, Richland, WA 99352; <sup>2</sup>Biological Sciences Division, Pacific Northwest National Laboratory, Richland WA, 99352;

**\*Corresponding Authors:** Hans C. Bernstein, Chemical and Biological Signature Science, Pacific Northwest National Laboratory, P. O. Box 999, MSIN: P7-50, Richland, WA 99352, phone: (509) 375-4518, email: [hans.bernstein@pnnl.gov](mailto:hans.bernstein@pnnl.gov)  
Alexander S. Beliaev, Biological Sciences Division, Pacific Northwest National Laboratory, P. O. Box 999, MS: P7-50, Richland, WA 99352, phone: (509) 376-6966, email: [alex.beliaev@pnnl.gov](mailto:alex.beliaev@pnnl.gov)

### 1.1 Biomass and chlorophyll contents

Chlorophyll *a* (Chl) concentration of the cells was determined spectrophotometrically by a previously described method<sup>1</sup>. Chl *a* concentrations, in µg of Chl ml<sup>-1</sup> were calculated by Equation S1.

$$[Chl] = 14.97(A_{678} - A_{730}) - 0.615(A_{625} - A_{730}) \quad \text{Eq. S1}$$

As observed in a related study<sup>2</sup>, Chl *a* concentrations remained essentially constant at  $0.95 \pm 0.11$  mg L<sup>-1</sup> from the steady-state through the end of the H<sub>2</sub> production.

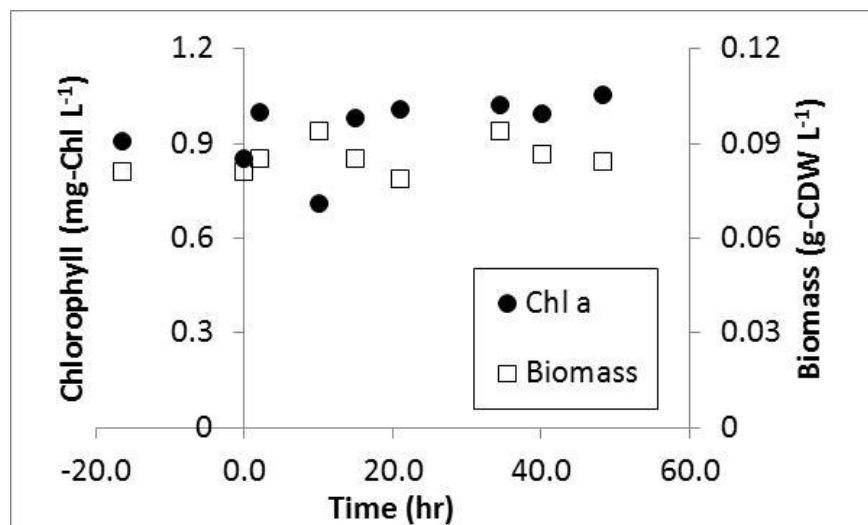

**Figure S1.** Chl *a* and ash-free dry weight biomass measurements over the H<sub>2</sub> production profile. Time zero indicates onset of nitrogen-depletion and absence of media addition (dilution rate = 0). Times prior to t = 0 represent measurements taken during the ammonia limited chemostat controlled steady-state.

**1.2 Measurements of chlorophyll fluorescence.** Variable Chl *a* fluorescence and fluorescence kinetic traces were measured by a previously reported methods<sup>3</sup>. Briefly, cells were sampled from the photobioreactor and dark-adapted for 5 min prior to taking measurements via pulse amplitude-modulated fluorometry (PAM) in a DUAL-PAM-100 equipped with a photodiode detector and RG665 filter (Walz GmbH, Effeltrich, Germany). Variable Chl *a* fluorescence parameters (rETR<sub>max</sub> and Fv/Fm) were measured and interpreted via standard approaches<sup>4</sup>. The slope of the post-illumination fluorescence rises (df/dt) are proxy measurements for the rate of cyclic electron transport (rCEF)<sup>3,5</sup> and were only observed (qualitatively) from the ammonium-limited chemostat, precondition (Fig. S2).

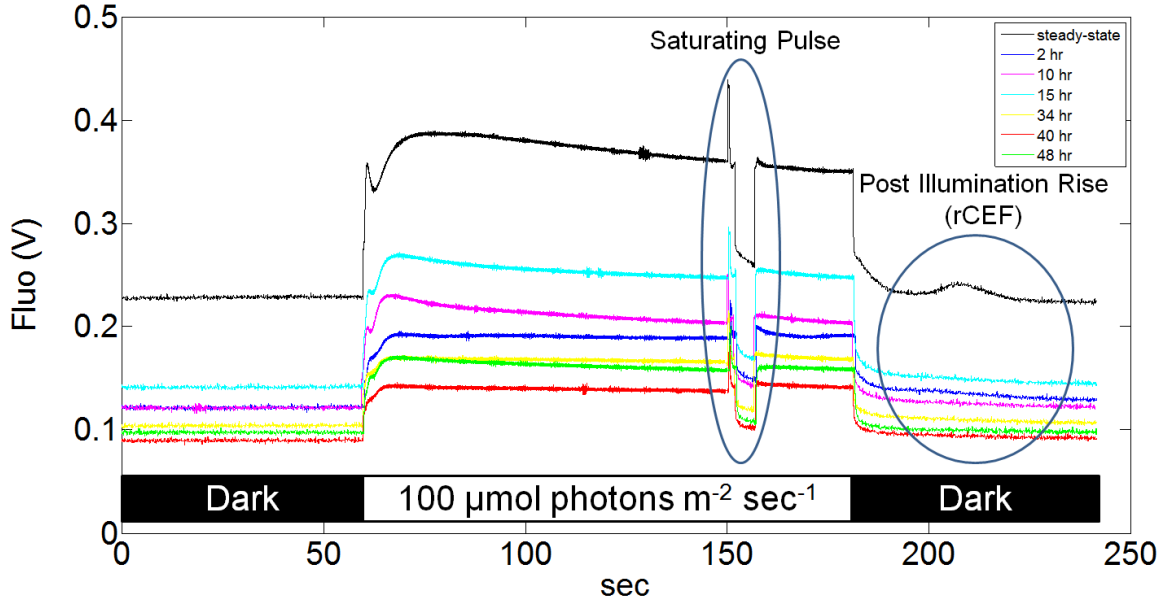

**Figure S2.** Chl *a* fluorescence traces measured from cells taken at different time points across the H<sub>2</sub> production transient. The post illumination rise in fluorescence is a result from reduction of plastoquinone from NAD(P)H or other reductants accumulated during illumination.

**1.3 Mass balance of biological H<sub>2</sub> and O<sub>2</sub> production.** The specific rates of net H<sub>2</sub> production and O<sub>2</sub> production were calculated from non-steady state mass balances represented in the following equation progression (Equations S3-S4). Simplified versions for the following equations were used for the steady-state reaction rates;  $q_{H_2}$  and  $q_{O_2}$ . Changes to the control volume, due to sampling, were considered negligible. The solute (H<sub>2</sub> or O<sub>2</sub>) is represented by the symbol  $x$ ; the  $k_l a$  values were experimentally measured to be 55 and 74 hr<sup>-1</sup> for O<sub>2</sub> and H<sub>2</sub> gas, respectively.

$$x \frac{dV}{dt} + V \frac{dx}{dt} = D \cdot V (x_{aq}^{in} - x_{aq}^{out}) + k_l^x a \cdot V (x_{gas}^{in} - x_{gas}^{out}) + R_{net}^x \cdot V \quad \text{Eq. S2}$$

The following assumptions and simplifications were made based on the reaction geometry to yield Equation S4: (i) changes to the control volume, due to sampling, were considered negligible; (ii) and the dilution rate ( $D$ ) was zero; (iii) the variable  $x_{gas}^{in}$  (gas phase concentration) was zero; for both H<sub>2</sub> and O<sub>2</sub>.

$$R_{net}^x = k_l^x a (x_{gas}^{out}) + \frac{dx}{dt} \quad \text{Eq. S3}$$

A finite difference approximation was substituted into Equation S3 and both sides of the equation were normalized by the corresponding biomass (g-CDW) to yield the final working form of an equation for the specific rates production;  $q_{H_2}$  or  $q_{O_2}$  (Equation S4). The parameter  $h$

is defined as the time difference between sample steps normalized by the total number of samples.

$$q_x(t) \approx k_l^x a[x_{gas}^{out}(t)] + \frac{x(t) - x(t-1)}{h} \quad \text{Eq. S4}$$

## 2. Supplementary transcriptional and translational dynamics

### 2.1 Filtering of mRNA and protein expression data

All filtering and clustering was performed by custom Matlab (Mathworks) scripts that are available on request.

#### 2.1.1 Standard mRNA expression filtering algorithm

Messenger RNA expression profiles were filtered with the custom Matlab script *mRNA\_preproc\_1* which implements the following steps (in order): 1) genes with profile expression variances in the bottom 10% were masked, 2) genes with absolute expression profiles within the bottom 20% (RPKM values) were masked, 3) RPKM values equal to zero were assigned an arbitrarily low value of 0.5, 4) expression profiles with the 20% highest level entropy <sup>6</sup> were masked, 5) each expression value was normalized to its corresponding steady-state condition and log2 transformed.

#### 2.1.2 Standard protein expression filtering algorithm

Protein expression profiles were filtered with the custom Matlab script *mRNA\_preproc\_3* which implements the following steps (in order): 1) proteins with profile expression variances in the bottom 10% were masked, 2) protein expression profiles with the 20% highest level entropy <sup>6</sup> were masked, 5) each expression value was normalized to its corresponding steady-state condition and log2 transformed.

### 2.2 Synchronized profiles of protein and mRNA expression

These profiles were identified and calculated with the custom Matlab script *systiter\_V2* which implements the following steps (in order): 1) protein expression profiles were filtered (see 2.1.2.) and organized by K-means into six groups, 2) each cluster was assigned a numeric cluster ID (1-6), 3) the mRNA expression files and gene IDs were collected from each protein cluster, 4) the mRNA expression profiles exhibiting variance across the profile in the bottom 10% were masked, and the corresponding gene IDs were logged, 4) protein expression profiles corresponding to genes that were masked in from the gene variance filter were also masked. This

algorithm output six clusters of protein and mRNA expression profiles containing identical coding genes.

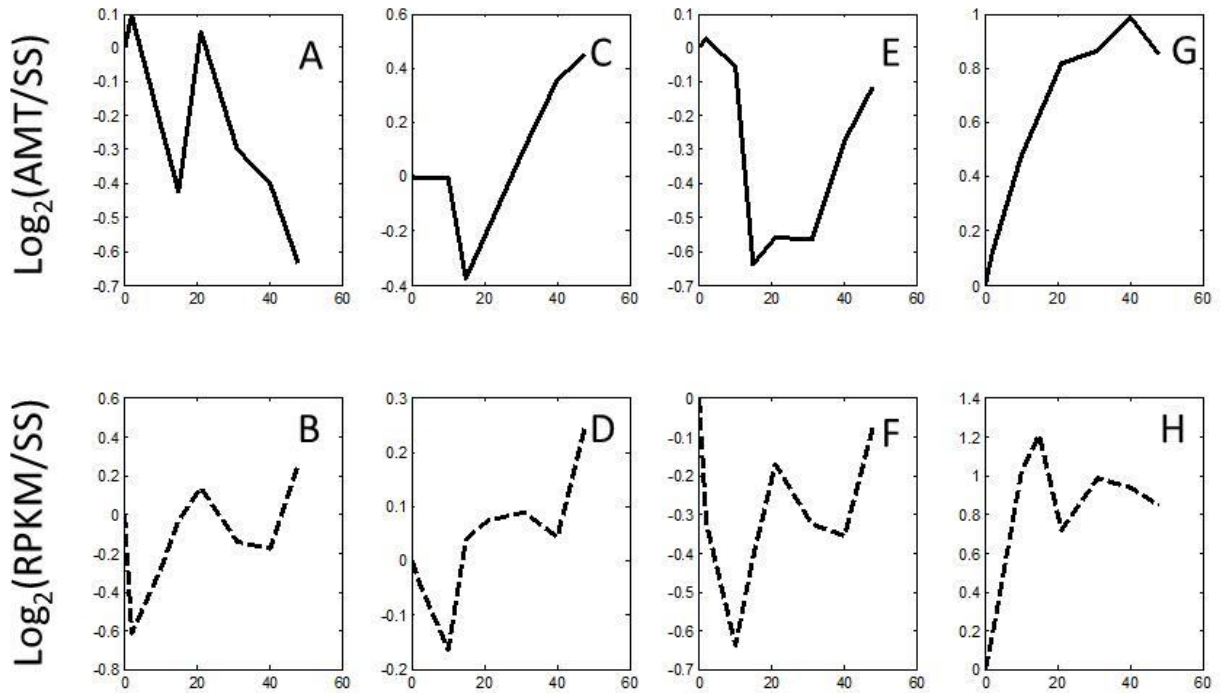

**Figure. S3.** K-means clustering of the relative protein abundances given in accurate mass and time (AMT) normalized by steady-state abundance. Plots represented as solid lines represent four clusters (mean value) calculated from 557 unfiltered protein profiles (of 1022). Dashed lines represent the mean value taken from the analogous gene transcripts. A and B) 159 proteins/transcripts enriched for TCA cycle second carbon oxidation processes ( $p < 0.05$ ); C and D) 162 proteins/transcripts enriched for PS II main subunits (does not include PsbA or PsbD;  $p < 0.05$ ); E and F) 88 proteins/transcripts enriched for PS I main subunits, Calvin-Benson cycle and Embden-Meyerhof processes ( $p < 0.02$ ); G and H) 148 proteins/transcripts enriched for nitrogen fixation (including NifHDK;  $p < 0.00001$ ). Abbreviation, SS, denotes the abundance measured at steady-state.

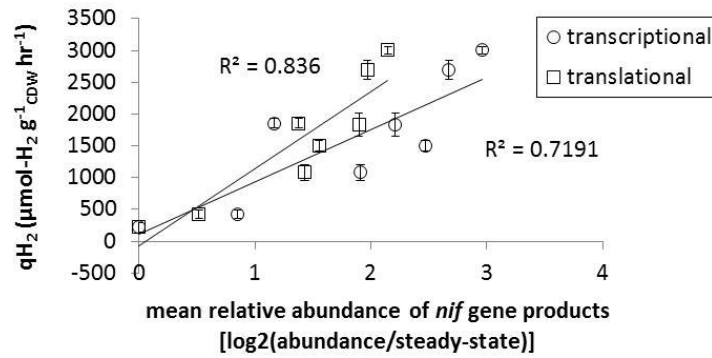

**Figure S4.** The specific rate of H<sub>2</sub> production plotted against the relative abundance profiles of *nif* gene transcripts (20 genes; open circles) and Nif proteins (12 proteins; open squares). Each relative abundance sample represents the mean taken at each time sample. Each specific rate value represents the mean over < 5 of continuously data logged measurements (minute sampling frequency). Error bars represent  $\pm 1$  standard deviation.  $R^2$  values correspond to linear regression of each data set and are indications for proportionality.

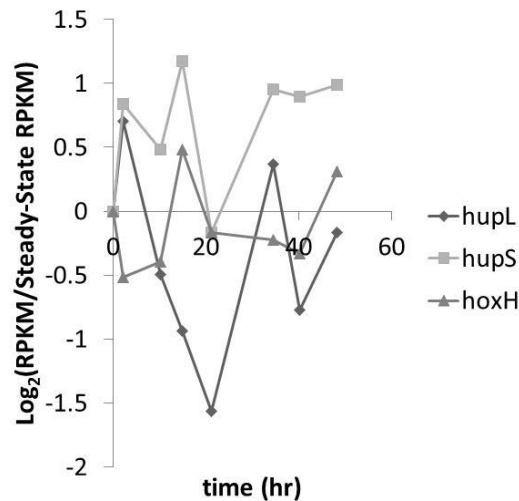

**Figure S5.** Relative abundance profiles of uptake (hup) and bi-directional (hox) hydrogenase transcripts.

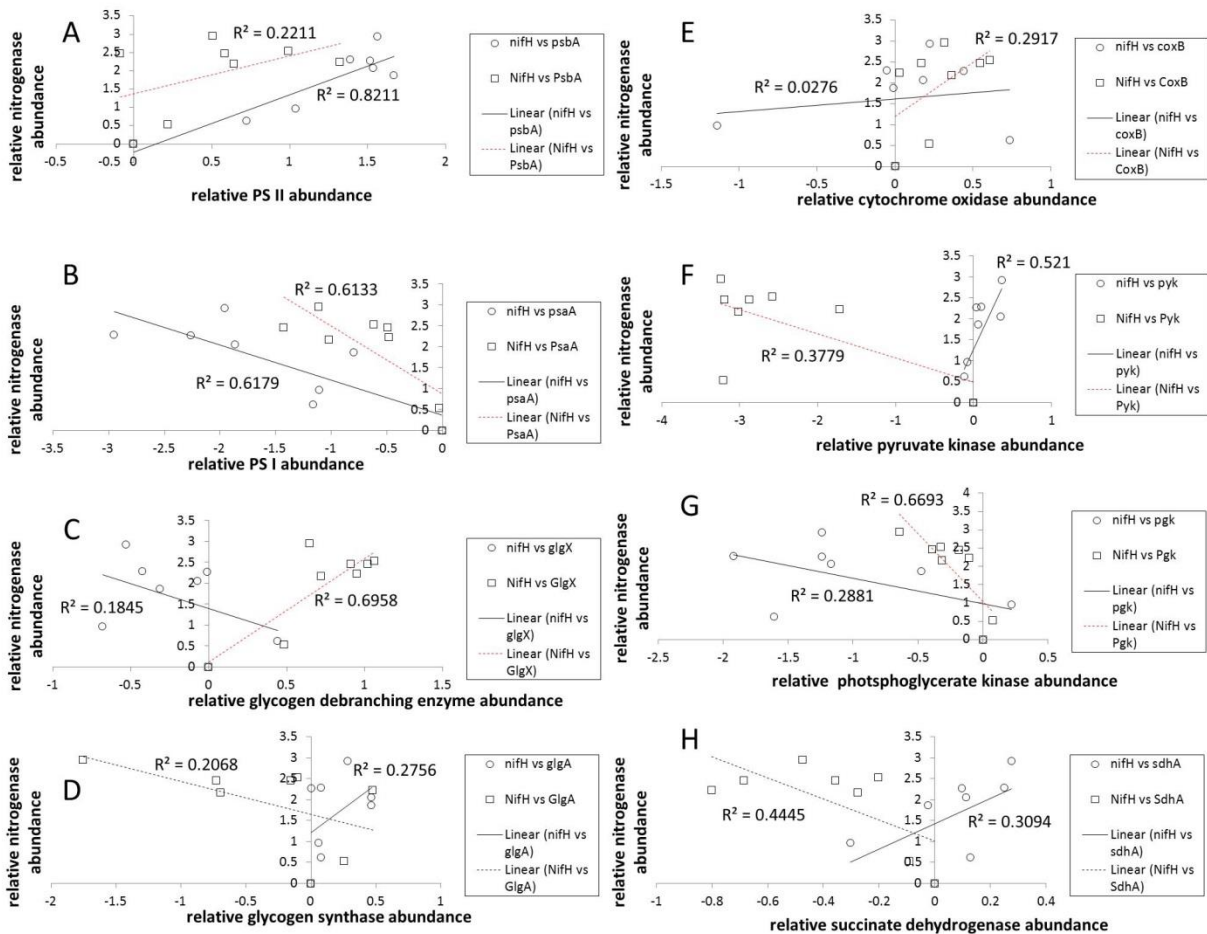

**Figure S6.** Linear correlations between the relative abundance profiles of NifH transcripts [ $\log_2(\text{RPKM}/\text{steady-state RPKM})$ ; solid lines] and proteins [ $\log_2(\text{AMT}/\text{steady-state AMT})$ ; dashed red lines]. The following correlations were considered: A) PsbA as a proxy for PS II, B) PsaA as a proxy for PS I, C) GlgX as a proxy for glycogen degradation, D) GlgA as a proxy for glycogen synthesis, E) CoxB as a proxy for respiration and oxidative phosphorylation, F) Pyk as a proxy for glycolysis and glycogen catabolism, G) Pgk as a second proxy for glycolysis and glycogen catabolism, and H) SdhA as a proxy for oxidative glycogen catabolism.

**Table S1.** Functional enrichment of mRNA clusters

| RNA Modules with Argon and CO <sub>2</sub> | Subsystem                                                     | p-value | Ratio   | % Module | % Genome |
|--------------------------------------------|---------------------------------------------------------------|---------|---------|----------|----------|
| 1_red                                      | peptidoglycan biosynthesis                                    | 0.0304  | 4.8840  | 1.6575   | 0.3394   |
| 1_red                                      | phyloquinone biosynthesis via SEPHCHC                         | 0.0409  | 7.3260  | 1.1050   | 0.1508   |
| 1_red                                      | lipopolysaccharide export system LptABCDEFG                   | 0.0149  | 14.6519 | 1.1050   | 0.0754   |
| 2_blue                                     | photosystem II other common subunits                          | 0.0057  | 3.7431  | 0.9174   | 0.2451   |
| 2_blue                                     | plastoquinol/plastocyanin reductase (cytochrome b6-f complex) | 0.0369  | 3.3792  | 0.5734   | 0.1697   |
| 2_blue                                     | photosystem I main subunits                                   | 0.0034  | 6.0826  | 0.6881   | 0.1131   |
| 2_blue                                     | phosphate signalling cascade PhoBRU-PstABCS                   | 0.0410  | 4.0550  | 0.4587   | 0.1131   |
| 2_blue                                     | lycopene biosynthesis from isopentyl pyrophosphate (IPP)      | 0.0410  | 4.0550  | 0.4587   | 0.1131   |
| 2_blue                                     | glucosylglycerol biosynthesis                                 | 0.0403  | 6.0826  | 0.3440   | 0.0566   |
| 2_blue                                     | phycocyanin biosynthesis                                      | 0.0055  | 5.2136  | 0.6881   | 0.1320   |
| 2_blue                                     | photosystem II other subunits in cyanobacteria                | 0.0403  | 6.0826  | 0.3440   | 0.0566   |
| 2_blue                                     | photosynthetic electron transport                             | 0.0492  | 3.0413  | 0.5734   | 0.1885   |
| 3_yellow                                   | pentose phosphate pathway_oxidative phase                     | 0.0152  | 9.1448  | 0.5172   | 0.0566   |
| 3_yellow                                   | phycobilisome turnover                                        | 0.0366  | 5.4869  | 0.5172   | 0.0943   |



|           |                                                                                     |        |         |        |        |
|-----------|-------------------------------------------------------------------------------------|--------|---------|--------|--------|
| 3_yellow  | NAD(P)H:quinone<br>oxidoreductase (complex I)<br>NdhABCDEFGHIJKLMNOPS               | 0.0105 | 3.0483  | 1.3793 | 0.4525 |
| 3_yellow  | uridine monophosphate<br>biosynthesis from glutamine                                | 0.0119 | 4.5724  | 0.8621 | 0.1885 |
| 3_yellow  | tRNA aminoacylation                                                                 | 0.0439 | 2.6128  | 1.0345 | 0.3959 |
| 3_yellow  | Nucleotide excision repair                                                          | 0.0246 | 6.8586  | 0.5172 | 0.0754 |
| 4_magenta | polymorphic toxins                                                                  | 0.0386 | 1.9579  | 2.3256 | 1.1878 |
| 4_magenta | polysaccharide biosynthesis                                                         | 0.0447 | 2.5698  | 1.1628 | 0.4525 |
| 4_magenta | sulfur modification of DNA                                                          | 0.0388 | 5.1395  | 0.5814 | 0.1131 |
| 5_green   | uridine monophosphate<br>biosynthesis from glutamine                                | 0.0395 | 7.2658  | 1.3699 | 0.1885 |
| 5_green   | lipoic acid metabolism                                                              | 0.0100 | 18.1644 | 1.3699 | 0.0754 |
| 5_green   | protease_ periplasmic                                                               | 0.0068 | 24.2192 | 1.3699 | 0.0566 |
| 5_green   | NAD(P) biosynthesis common<br>pathway from nicotinic acid<br>mononucleotide route 1 | 0.0041 | 36.3288 | 1.3699 | 0.0377 |
| 6_black   | ClpP1-ClpP2-ClpX proteolytic<br>complex                                             | 0.0136 | 5.1797  | 0.4883 | 0.0943 |
| 6_black   | ribosome small subunit                                                              | 0.0039 | 2.9598  | 1.1719 | 0.3959 |
| 6_black   | RNA polymerase RpoABCEZ                                                             | 0.0435 | 4.1438  | 0.3906 | 0.0943 |
| 6_black   | photosystem II main subunits                                                        | 0.0442 | 2.8253  | 0.5859 | 0.2074 |
| 6_black   | Nitrogen fixation                                                                   | 0.0000 | 4.7293  | 2.0508 | 0.4336 |

**Table S2.** Functional enrichment of protein clusters

| Protein (k-means) clusters | Subsystem                                               | p-value | Ratio   | % Module | % Genome |
|----------------------------|---------------------------------------------------------|---------|---------|----------|----------|
| 1                          | pentose phosphate pathway_oxidative phase               | 0.0026  | 39.7303 | 2.2472   | 0.0566   |
| 1                          | translation elongation factor                           | 0.0327  | 59.5955 | 1.1236   | 0.0189   |
| 1                          | Double strand breaks repair                             | 0.0134  | 13.2434 | 2.2472   | 0.1697   |
| 1                          | ribosome large subunit                                  | 0.0000  | 14.8989 | 8.9888   | 0.6033   |
| 1                          | citrate cycle_ 2-OGDH bypass                            | 0.0487  | 29.7978 | 1.1236   | 0.0377   |
| 1                          | biosynthesis of UDP-N-acetyl-D-mannosamine (UDP-mannAc) | 0.0327  | 59.5955 | 1.1236   | 0.0189   |
| 1                          | allophycocyanin biosynthesis                            | 0.0071  | 19.8652 | 2.2472   | 0.1131   |
| 1                          | chaperone system: GroEL/GroES                           | 0.0026  | 39.7303 | 2.2472   | 0.0566   |
| 1                          | TCA cycle second carbon oxidation                       | 0.0487  | 29.7978 | 1.1236   | 0.0377   |
| 1                          | phycocyanin biosynthesis                                | 0.0090  | 17.0273 | 2.2472   | 0.1320   |
| 1                          | cell division                                           | 0.0487  | 29.7978 | 1.1236   | 0.0377   |
| 1                          | acetyl-CoA biosynthesis from acetate_ direct            | 0.0327  | 59.5955 | 1.1236   | 0.0189   |
| 1                          | rRNA transcription factors                              | 0.0001  | 59.5955 | 3.3708   | 0.0566   |
| 1                          | photosynthetic electron transport                       | 0.0011  | 17.8787 | 3.3708   | 0.1885   |
| 1                          | Nitrogen fixation                                       | 0.0086  | 7.7733  | 3.3708   | 0.4336   |

|   |                                                                    |        |         |        |        |
|---|--------------------------------------------------------------------|--------|---------|--------|--------|
| 2 | histidine biosynthesis from ribose-5-phosphate                     | 0.0314 | 8.5000  | 1.2821 | 0.1508 |
| 2 | photosystem I high light stabilizing complex                       | 0.0113 | 17.0000 | 1.2821 | 0.0754 |
| 2 | Calvin-Benson cycle                                                | 0.0024 | 14.5714 | 1.9231 | 0.1320 |
| 2 | NAD(P)H:quinone oxidoreductase (complex I)<br>NdhABCDEFGHIJKLMNOPS | 0.0002 | 8.5000  | 3.8462 | 0.4525 |
| 2 | purine (inosine-5'-phosphate) biosynthesis from ribose-5-phosphate | 0.0081 | 8.5000  | 1.9231 | 0.2262 |
| 2 | ClpP1-ClpP2-ClpX proteolytic complex                               | 0.0155 | 13.6000 | 1.2821 | 0.0943 |
| 2 | phosphate homeostasis                                              | 0.0203 | 11.3333 | 1.2821 | 0.1131 |
| 2 | Embden-Meyerhof pathway                                            | 0.0024 | 14.5714 | 1.9231 | 0.1320 |
| 2 | photosystem II biogenesis                                          | 0.0004 | 15.1111 | 2.5641 | 0.1697 |
| 2 | photosystem II main subunits                                       | 0.0066 | 9.2727  | 1.9231 | 0.2074 |
| 2 | threonine biosynthesis from homoserine                             | 0.0077 | 22.6667 | 1.2821 | 0.0566 |
| 2 | DNA gyrase modulation                                              | 0.0077 | 22.6667 | 1.2821 | 0.0566 |
| 3 | uridine monophosphate biosynthesis from glutamine                  | 0.0495 | 6.3904  | 1.2048 | 0.1885 |
| 3 | pyruvate dehydrogenase complex PdhABCD-AceE                        | 0.0127 | 15.9759 | 1.2048 | 0.0754 |
| 3 | tRNA aminoacylation                                                | 0.0010 | 7.6076  | 3.0120 | 0.3959 |
| 3 | F1/F0 ATPase AtpABCDEFGH                                           | 0.0063 | 9.5855  | 1.8072 | 0.1885 |
| 3 | branched chain amino acid biosynthesis                             | 0.0014 | 19.1711 | 1.8072 | 0.0943 |

|   |                                                                        |        |         |        |        |
|---|------------------------------------------------------------------------|--------|---------|--------|--------|
| 3 | Plastoquinol plastocyanin reductase (cytochrome b6-f complex)          | 0.0049 | 10.6506 | 1.8072 | 0.1697 |
| 3 | ClpP1-ClpP2-ClpX proteolytic complex                                   | 0.0014 | 19.1711 | 1.8072 | 0.0943 |
| 3 | chlorophyllide a biosynthesis from protoporphyrin IX                   | 0.0421 | 7.1004  | 1.2048 | 0.1697 |
| 3 | ribosome large subunit                                                 | 0.0226 | 3.9940  | 2.4096 | 0.6033 |
| 3 | photosystem I main subunits                                            | 0.0001 | 21.3012 | 2.4096 | 0.1131 |
| 3 | ornithine biosynthesis from glutamate_ acetylated branch               | 0.0127 | 15.9759 | 1.2048 | 0.0754 |
| 3 | Calvin-Benson cycle_ Embden-Meyerhof pathway                           | 0.0127 | 15.9759 | 1.2048 | 0.0754 |
| 3 | ribosome small subunit                                                 | 0.0063 | 6.0861  | 2.4096 | 0.3959 |
| 3 | RNA polymerase RpoABCEZ                                                | 0.0001 | 25.5614 | 2.4096 | 0.0943 |
| 3 | 4_6-dideoxy-4-oxo-dTDP-D-glucose biosynthesis from glucose-1-phosphate | 0.0086 | 21.3012 | 1.2048 | 0.0566 |
| 3 | glycogen metabolism                                                    | 0.0174 | 12.7807 | 1.2048 | 0.0943 |
| 3 | citrate cycle_ first carbon oxidation                                  | 0.0086 | 21.3012 | 1.2048 | 0.0566 |
| 3 | IPP biosynthesis via deoxyxylulose                                     | 0.0286 | 9.1291  | 1.2048 | 0.1320 |
| 4 | chorismate biosynthesis via shikimate                                  | 0.0135 | 14.6317 | 1.3793 | 0.0943 |

|   |                                   |        |         |        |        |
|---|-----------------------------------|--------|---------|--------|--------|
| 4 | ribosome large subunit            | 0.0004 | 6.8586  | 4.1379 | 0.6033 |
| 4 | peroxide detoxification           | 0.0330 | 8.1287  | 1.3793 | 0.1697 |
| 4 | ribosome small subunit            | 0.0001 | 10.4512 | 4.1379 | 0.3959 |
| 4 | translation elongation            | 0.0135 | 14.6317 | 1.3793 | 0.0943 |
| 4 | chaperone system: DnaK-DnaJ-GrpE  | 0.0135 | 14.6317 | 1.3793 | 0.0943 |
| 4 | phycobilin biosynthesis           | 0.0067 | 24.3862 | 1.3793 | 0.0566 |
| 4 | photosynthetic electron transport | 0.0390 | 7.3159  | 1.3793 | 0.1885 |
| 4 | Nitrogen fixation                 | 0.0000 | 15.9040 | 6.8966 | 0.4336 |

## References Cited

- 1 Min, H. & Sherman, L. A. Hydrogen production by the unicellular, diazotrophic cyanobacterium *Cyanothece* sp. strain ATCC 51142 under conditions of continuous light. *Applied and environmental microbiology* **76**, 4293-4301 (2010).
- 2 Melnicki, M. R. *et al.* Sustained H<sub>2</sub> production driven by photosynthetic water splitting in a unicellular cyanobacterium. *MBio* **3**, e00197-00112 (2012).
- 3 Bernstein, H. C. *et al.* Effect of mono-and dichromatic light quality on growth rates and photosynthetic performance of *Synechococcus* sp. PCC 7002. *Frontiers in microbiology* **5** (2014).
- 4 Schreiber, U. in *Chlorophyll a Fluorescence* 279-319 (Springer, 2004).
- 5 Deng, Y., Ye, J. & Mi, H. Effects of low CO<sub>2</sub> on NAD (P) H dehydrogenase, a mediator of cyclic electron transport around photosystem I in the cyanobacterium *Synechocystis* PCC6803. *Plant and cell physiology* **44**, 534-540 (2003).
- 6 Liu, H., Li, J. & Wong, L. A comparative study on feature selection and classification methods using gene expression profiles and proteomic patterns. *Genome informatics* **13**, 51-60 (2002).
